# Supplementary material
Source: Springer Nature journal article supplement (https://www.springermedizin.de/resource/supplementary/13017_2014_395_MOESM4_ESM.pdf/9636104)

**A****Males**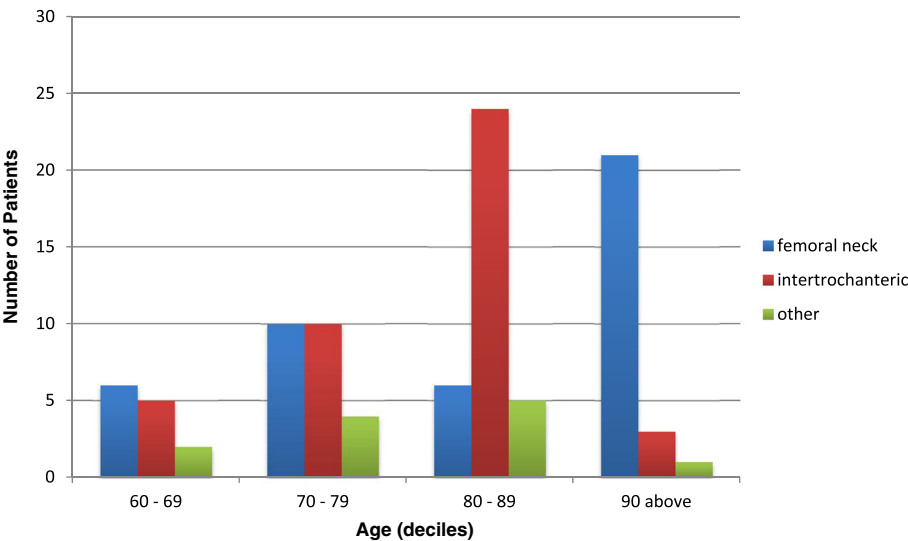**B****Females**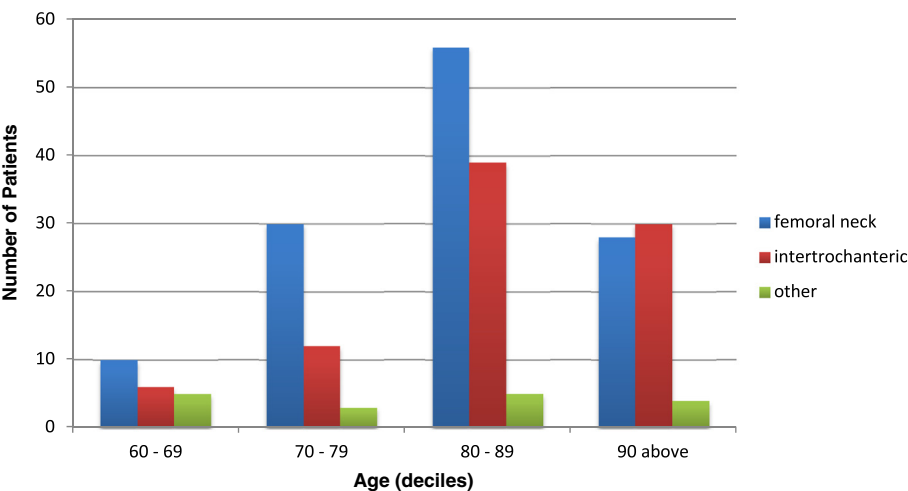

Supplement: MOESM4 [file 9636104]
